# Supplementary material for: Imputation Disparities Driven by Recent Selection and Their Impact on Disease Risk Estimation in East and Southeast Asian Populations
Source: Research Square preprint supplement (doi:10.21203/rs.3.rs-6440282/v1), 2025-05-29
Supplement: Supplementary file [file 4a0554b5110f42aa87a82ff9.pdf]

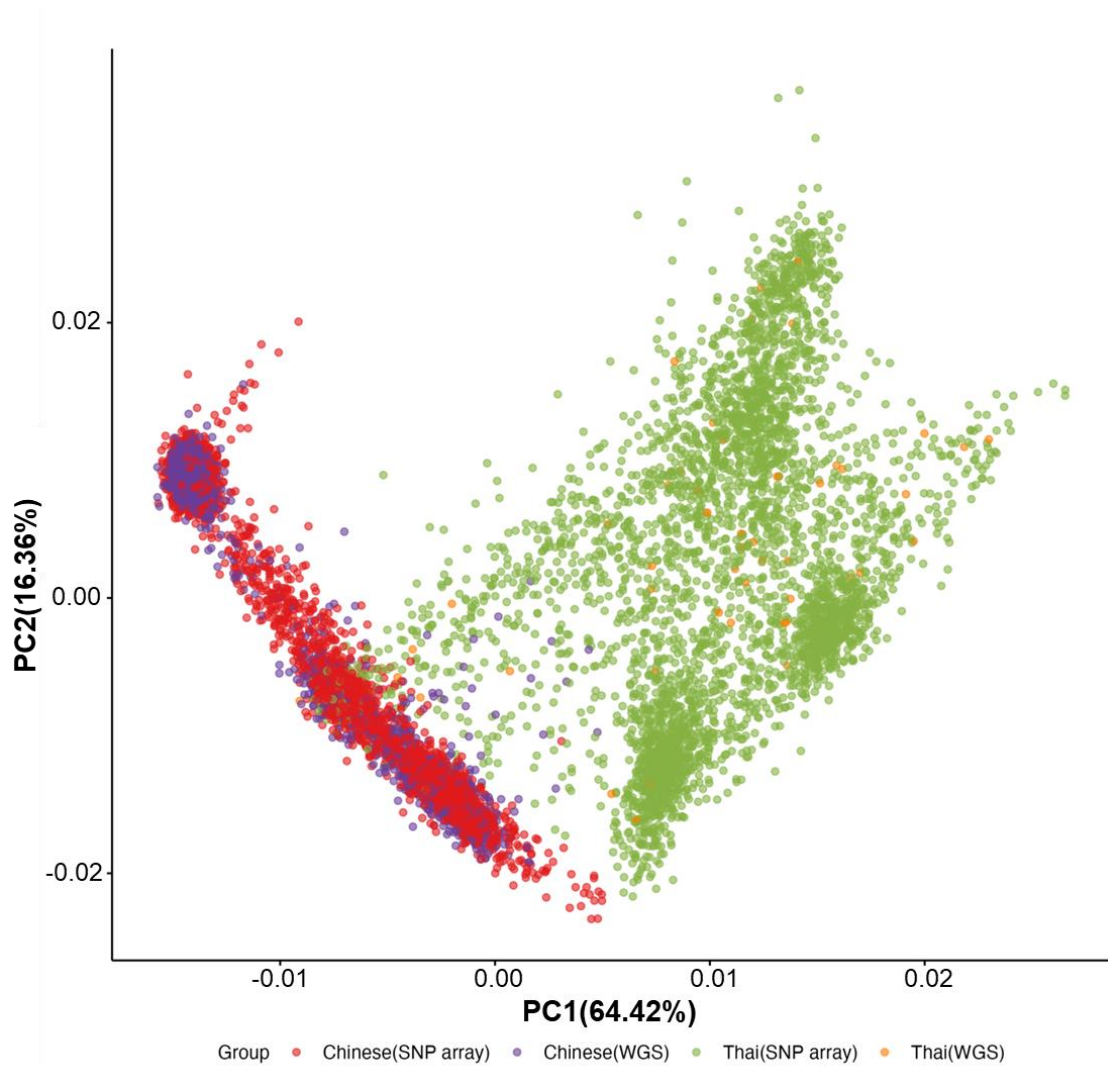

**Supplementary Figure 1 Principal Component Analysis (PCA) of Samples from Whole Genome Sequencing (WGS) and SNP Arrays in the Chinese and Thai Datasets**

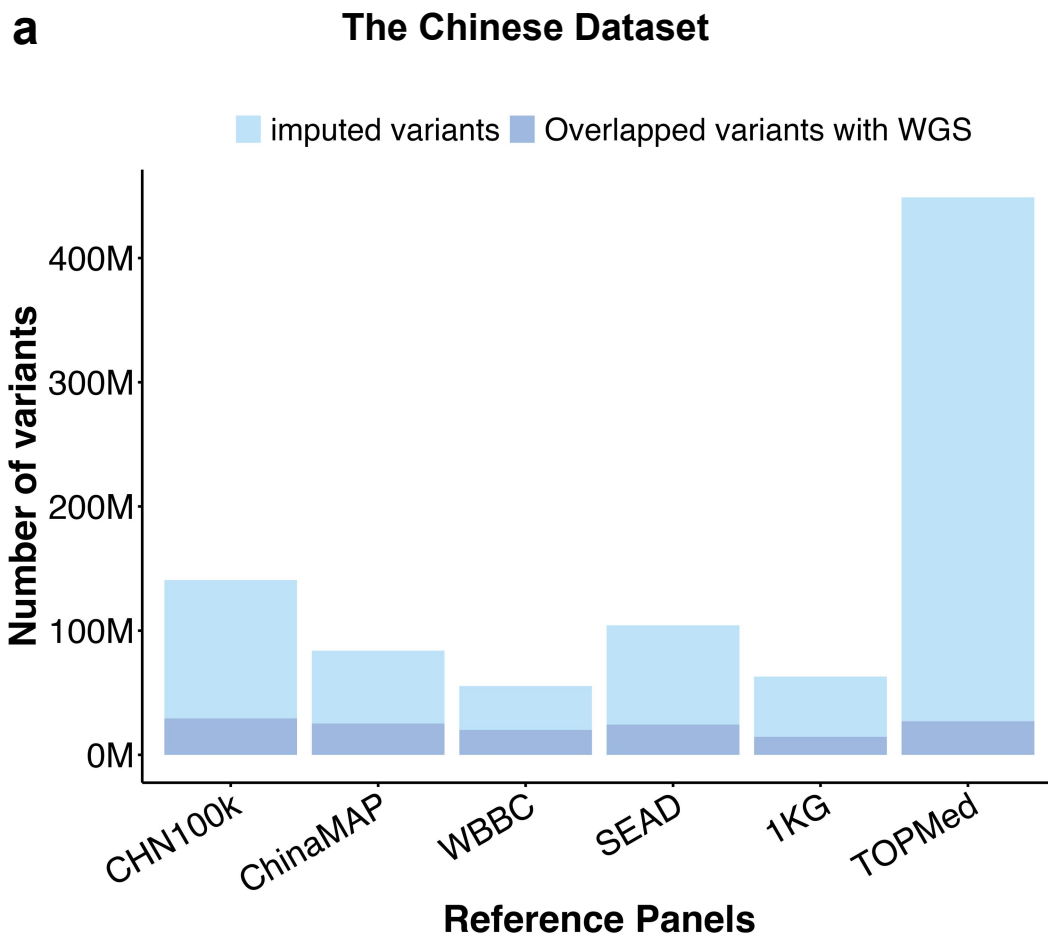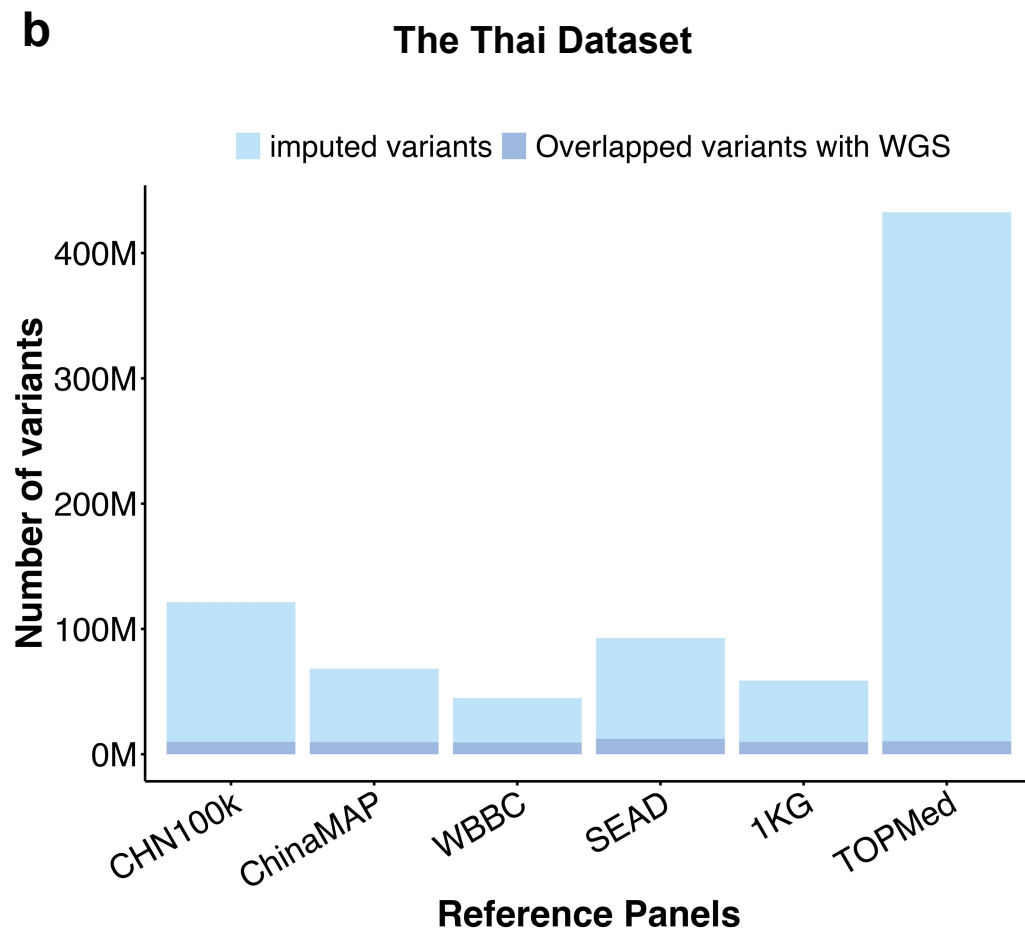

**Supplementary Figure 2 Summary of Imputed Variants Across Reference Panels and Their Overlap with Variants Detected by Whole Genome Sequencing (WGS) in Chinese (a) and Thai Datasets (b)**

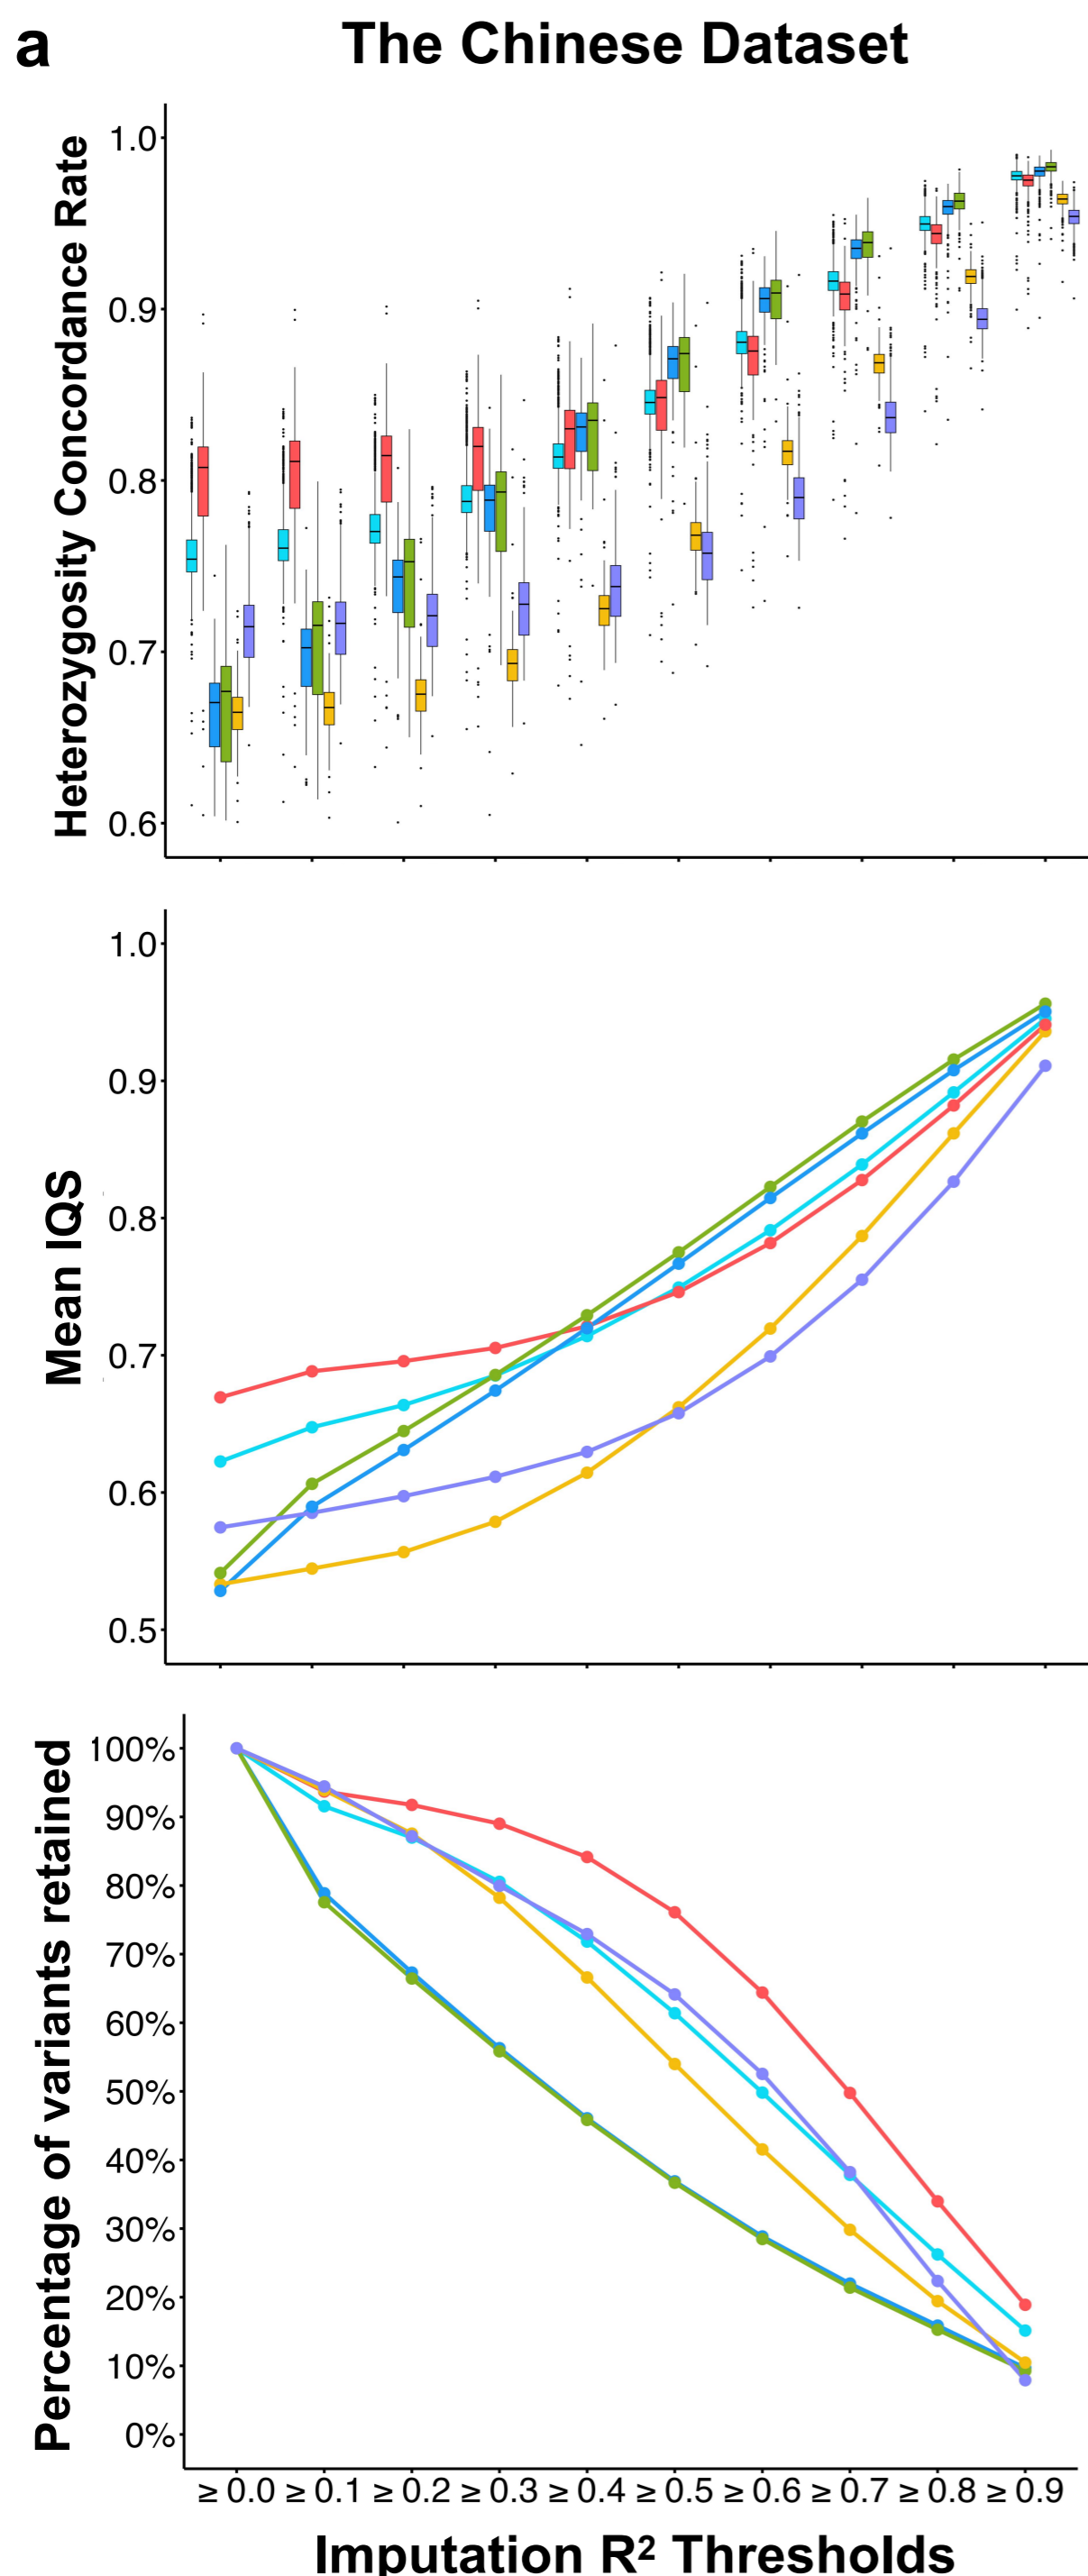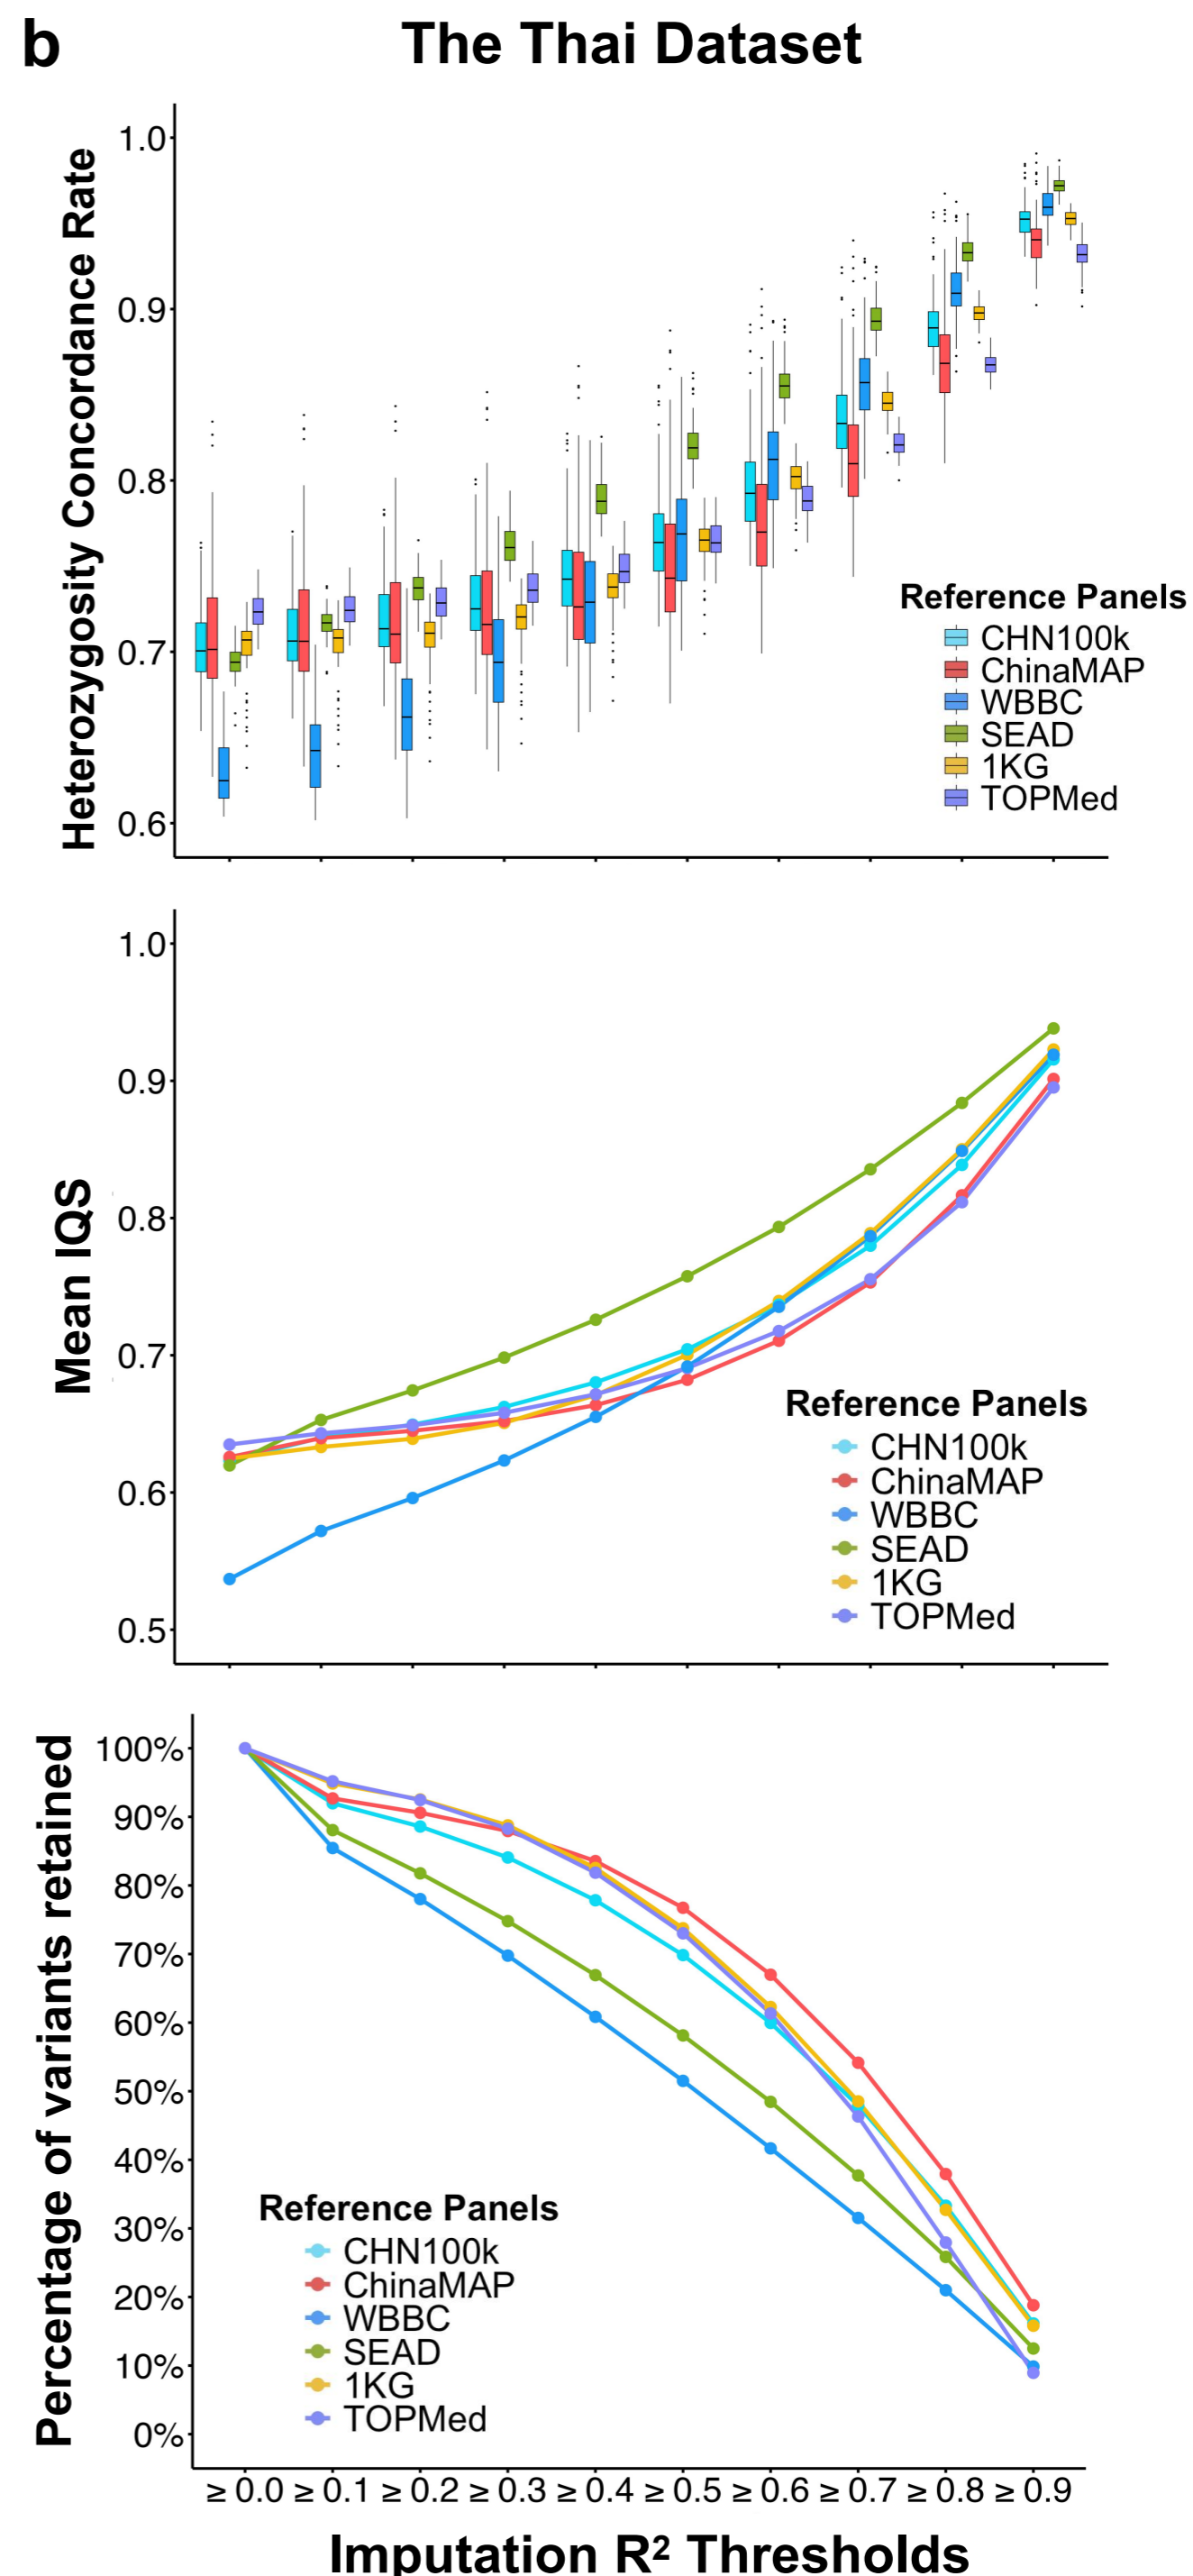

**Supplementary Figure 3 Evaluation of Imputation Quality for Low-Frequency Variants Across Reference Panels by Imputation R<sup>2</sup> Thresholds in Chinese (a) and Thai (b) WGS Datasets**

The X-axis represents imputation R<sup>2</sup> threshold categories, while the Y-axis in the top panel displays heterozygosity concordance rate for each sample. The middle panel shows the mean imputation quality score (IQS) and the bottom panel represents percentage of variants retained across R<sup>2</sup> thresholds. Low-frequency variants refer to variants with minor allele frequency less than 0.05.

a

## The Chinese Dataset

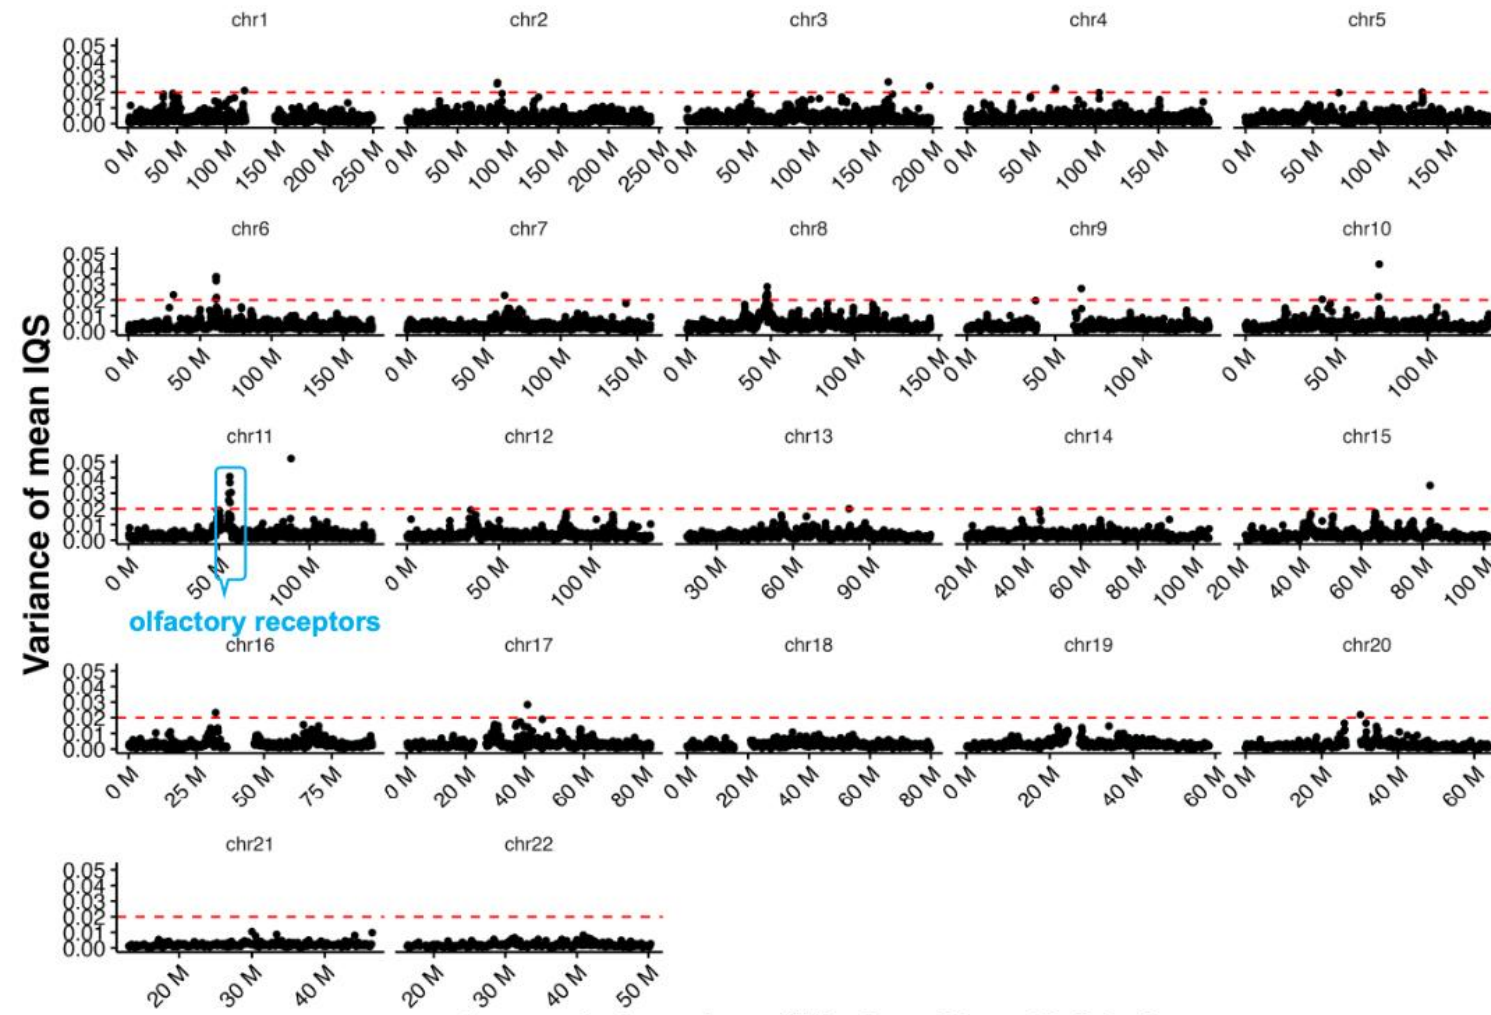

b

## The Thai Dataset

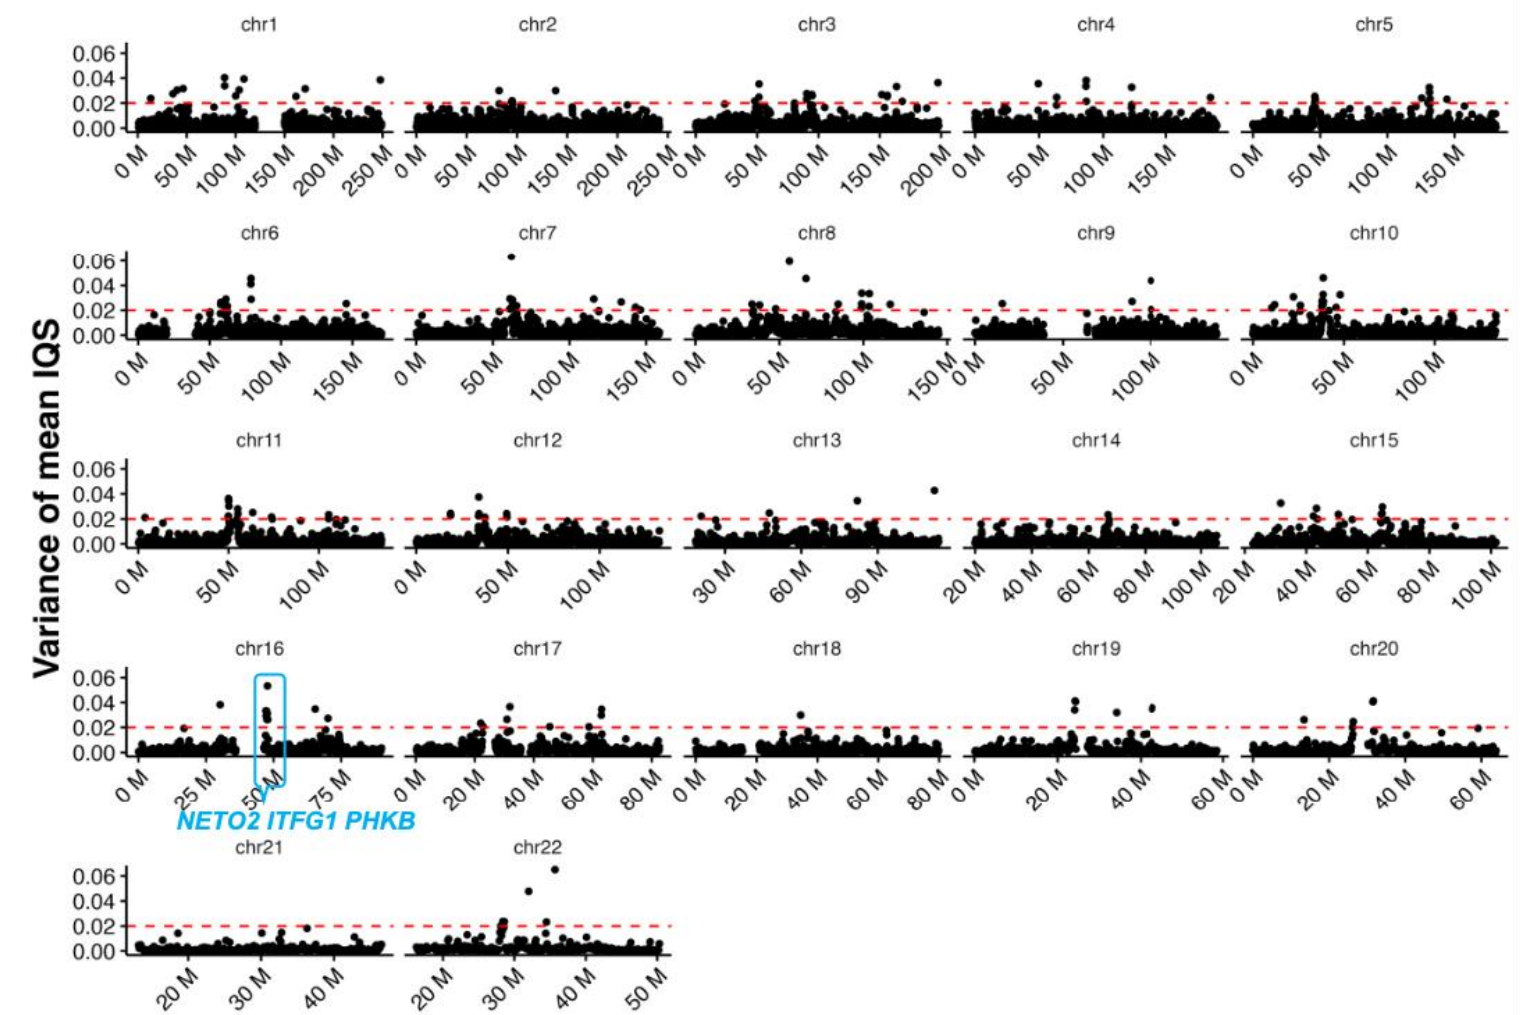

**Supplementary Figure 4 Overview of Imputation Variations in Reference Panels Across Genomic Regions in Chinese (a) and Thai (b) Datasets**

Each dot corresponds to a 100kb genomic region
